# Supplementary material for: Impact of a Population Genomic Screening Program on Health Behaviors Related to Familial Hypercholesterolemia Risk Reduction
Source: PubMed Central journal article supplement (PMC9584046; doi:10.1161/circgen.121.003549), 2022-07-12
Supplement: hcg-15-e003549-s001.pdf [file hcg-15-e003549-s001.pdf]

## **SUPPLEMENTAL MATERIAL**

### **SUPPLEMENTAL METHODS**

#### **Study Setting**

This study was conducted at Geisinger, an integrated health care system serving central and northeastern Pennsylvania. Geisinger has hospital and ambulatory clinics, known as Geisinger Clinic, and a health insurance plan, Geisinger Health Plan (GHP). Approximately 30% of Geisinger Clinic participants are also GHP members. In MyCode, participant-participants provide samples which undergo exome sequencing. The MyCode research protocol has been detailed in previous publications.<sup>37-39</sup> Medically actionable variants associated with Mendelian disease are disclosed to both primary care clinicians (clinicians) and participants to inform future care. Results disclosure began in May 2015. Pharmacogenomic information (i.e., *SLCO1B1* variant status) is not currently returned to primary care clinicians and participants in MyCode.

#### **Study cohort**

The study population includes all adult MyCode participants from the 92,455 cohort, with variants in FH-associated genes, disclosed by the Genomic Screening and Counseling Program.<sup>37</sup> The study population had a significantly higher proportion of European ancestry and non-Hispanic ethnicity, older median age, and higher comorbidity index when compared to active Geisinger participants.<sup>30</sup> Multiple sources of health data, described in full below, were reviewed for a period beginning 2 years prior to the participant receiving a result and ending January 16, 2019. Individuals were excluded from data analysis if they: 1) withdrew from MyCode, 2) died, or 3) only had self-reported medication data available in the electronic health record (EHR).

#### **Study Design**

This is a retrospective observational study to compare clinician and participant behaviors and health outcomes before and after disclosure of a genomic risk variant in an FH-associated gene. The main outcomes are 1) clinician behavior, 2) participant behavior, and 3) impact of behavior on lipid levels, as defined below.

### Data sources

The main data sources were the Geisinger EHR and GHP prescription claims data. Discrete EHR data were extracted through automated methods and included demographics, problem list diagnoses including hypercholesterolemia and FH (ICD-10 diagnostic code E78.01), lipid-lowering therapy prescriptions, lipid panels, and documentation of statin intolerance which is defined as statin allergy or documentation in a clinic note. Manual chart review was performed to validate and supplement non-discrete data including reasons for discontinuing lipid-lowering therapies. Prescription fill data from the EHR and claims data were used to supplement the EHR prescription information prescribed by non-Geisinger clinicians. Impact of *SLCO1B1* variant status obtained from MyCode exome sequencing data was evaluated.

To address possible missing health utilization data in the EHR, we evaluated and assessed the completeness of prescriptions and lipid panel laboratory data obtained from the EHR. We compared prescription and lipid panel utilization information in claims data, in a subset of the population who are GHP members and have at least 1 year of coverage, with what we obtained using the EHR supplemented with prescription adjudication data from community pharmacy among the same subset population. The analysis of the GHP subset showed that no missingness in prescription data was observed in the EHR supplemented with prescription fill data from community pharmacies; the discrepancy in lipid panel utilization was minimal (<5%). Given the high concordance, only EHR supplemented with prescription fill data were used for the remainder of the analyses.

## Study Outcomes

### *Clinician behavior after learning about a FH-associated genomic risk variant for their participant*

Clinician behavior was assessed pre- and post-disclosure by measuring the change in prescriptions for lipid-lowering therapies and in laboratory orders for a lipid panel. Medication prescriptions were categorized as follows: 1) prescription change—which is sub-categorized into intensification, no change in intensity or switch within the same medication class (only applicable to statin medications), and decrease in intensity, 2) no prescription change, and 3) no prescription. Documented reasons for discontinuation or no prescription were captured.

Intensification was defined as the addition of medication therapy or increase in dose of current medications. No change in intensity or switch within the same medication class was defined as an increase or decrease in the dose of a statin or change in statin prescribed but not change in intensity based on the 2018 cholesterol guideline list of statin intensity. Decrease in intensity was defined as a removal of medication therapy or decrease in dose of current medications. No prescription change was defined as no change in medications prescribed from pre to post disclosure. No prescription was defined as no lipid lowering medications data was available in the Geisinger EHR.

We examined several participant covariates' association with the clinicians' behavior of prescription change post-disclosure: sex, age (stratified as age $\leq$ 45 and age  $>$ 45), pre-disclosure LDL-C level (stratified as 3 groups: LDL-C  $<$  100 mg/dL, 100 mg/dL  $\leq$  LDL-C  $<$  190 mg/dL, and LDL-C  $\geq$  190 mg/dL), prior myocardial infarction (MI) and stroke, and statin intolerance. The pre-disclosure LDL-C value was defined as the most recent LDL-C drawn prior to the disclosure of the FH-associated variant.

### *Participant behavior after learning about their genomic risk variant for FH*

Participant behavior was measured by participants' utilization of healthcare services relevant to FH management including completed visit with a genetic counselor, having a lipid panel result, and medication adherence. Among the subset of participants with claims data available (i.e. had continuous GHP prescription coverage (with no more than a 60-day gap of membership coverage during the observation period) and at least one prescription refill in pre- and post-disclosure) participant behavior was measured by medication refills and adherence in the pre- and post-disclosure periods. Medication adherence was measured by proportion of days covered (PDC), which is calculated as the ratio between the number of days covered by the medication and the length of the observation period.<sup>40</sup> A PDC of 80% and above was considered adherent to lipid-lowering therapies.<sup>41</sup>

#### *Impact of clinician and participant behavior on lipid levels*

The impact of clinician and participant behaviors after disclosure of an FH risk variant on lipid levels was evaluated in participants who had both pre- and post-disclosure LDL-C values available for review. Post-disclosure LDL-C was defined as the last LDL-C drawn before the end of the study period. To reflect the impact of clinician and participant behavior on LDL-C levels, in this analysis, we further restricted post-disclosure LDL-C to include those that reflect the most recent prescription, i.e. LDL-C level had to be tested at least 4 weeks after changing the prescription. We categorized change from pre- to post- disclosure in LDL-C value into 2 categories: 1) at goal and 2) not at goal. LDL-C goal was either an LDL-C value <100 mg/dL for primary prevention or <70 mg/dL for secondary prevention.<sup>3</sup> The decrease and increase of LDL-C level was considered a change when LDL-C level changed at least 8% between values.<sup>42, 43</sup>

We examined the association between covariates including clinician prescribing behavior change, the participants' lipid levels, and participant characteristics including sex, age, pre-disclosure LDL-C (stratified as the 3 groups noted above), prior event of MI and stroke, and

statin intolerance (where we incorporated both clinically documented statin intolerance and pharmacogenomics, i.e. *SLCO1B1* variant status).

#### Sensitivity Analysis in Sub-cohort

For considerations of the potential influence on the validity of outcomes in case of short post-disclosure follow up period, we conducted a sensitivity analysis to measure the key outcomes in a subset of the study cohort who had “sufficient” post-disclosure period which is defined as at least 18 months. We measured the clinician behavior focusing on change of prescriptions for lipid-lowering therapies and the impact of behavior on lipid levels. We did not analyze the participant adherence in this sub-cohort due to too small a sample size.

#### **Statistical Analysis**

Descriptive analyses were conducted to describe demographics of the study cohort and outcome measures. Outcome measures of continuous variables between pre- and post-disclosure were compared using Wilcoxon signed rank test, paired t-test or Wilcoxon exact signed rank test as appropriate. Categorical variables were compared between pre- and post-disclosure using McNemar exact test. Multinomial logistic regression was used to examine the association between patients' characteristics and clinician behavior of prescription change in post-disclosure. Fisher exact test was used to analyze associations between co-variables including clinician prescribing behavior and whether participants' lipid levels achieved goal.

**Supplemental Table I.** Multinomial Logistic Regression Models on Factors Associated with Clinician Prescription Behavior

| <b>Study cohort—participants who have pre-disclosure LDL-C value (N = 77)</b> |                              |                     |            |       |                  |                           |
|-------------------------------------------------------------------------------|------------------------------|---------------------|------------|-------|------------------|---------------------------|
| <b>Relative risk ratio</b>                                                    |                              |                     |            |       |                  |                           |
|                                                                               | 100<=<br>pre_LDL-<br>C < 190 | pre_LDL-C<br>>= 190 | Age<br>>45 | Male  | Had<br>MI/Stroke | Had statin<br>intolerance |
| Prescription change                                                           | 4.894                        | <b>14.556</b>       | 0.933      | 2.363 | 3.261            | 2.492                     |
| No Prescription                                                               | 1.952                        | <b>22.874</b>       | 0.764      | 0.568 | 2.326            | 0.603                     |
| <b>p-value:</b>                                                               |                              |                     |            |       |                  |                           |
|                                                                               | 100<=<br>pre_LDL-<br>C < 190 | pre_LDL-C<br>>= 190 | Age<br>>45 | Male  | Had event        | Had statin<br>intolerance |
| Prescription change                                                           | 0.086                        | <b>0.024</b>        | 0.929      | 0.186 | 0.122            | 0.133                     |
| No Prescription                                                               | 0.578                        | <b>0.023</b>        | 0.769      | 0.570 | 0.433            | 0.564                     |

No Prescription Change is used as the comparison group, the results show statistics comparing Prescription Change and No Prescription Change, and comparing No Prescription with No Prescription Change group.

**Supplemental Table II.** Clinician behavior (sub-cohort of participants with at least 18m post-disclosure follow-up)

|                                                                          | <b>Sub-cohort (n = 30)</b> |                 |
|--------------------------------------------------------------------------|----------------------------|-----------------|
| <b>Prescriptions</b>                                                     | Pre-disclosure             | Post-disclosure |
| Participants with lipid-lowering therapy prescription, n (%)             | 25 (83.3)                  | 21 (70.0)       |
| High intensity statins, n (%)                                            | 18 (60.0)                  | 16 (53.3)       |
| Low/moderate intensity statins, n (%)                                    | 7 (23.3)                   | 3 (10.0)        |
| Ezetimibe, n (%)                                                         | 5 (16.7)                   | 10 (33.3)       |
| Niacin, n (%)                                                            | 1 (3.3)                    | 1 (3.3)         |
| Bile acid sequestrants, n (%)                                            | 3 (10.0)                   | 2 (6.7)         |
| PCSK9 inhibitor, n (%)                                                   | 0 (0.0)                    | 3 (10.0)        |
| Fenofibrate                                                              | 1 (3.3)                    | 1 (3.3)         |
| <b>Change in prescriptions after disclosure</b>                          |                            |                 |
| <i>Among the entire sub-cohort</i>                                       |                            | N=30            |
| Prescription change, n (%)                                               | 12 (40.0)                  |                 |
| Intensification, n (%)                                                   | 10 (83.3)                  |                 |
| No change in intensity or switch within the same medication class, n (%) | 0 (0.0)                    |                 |
| Decrease in intensity, n (%)                                             | 2 (16.7)                   |                 |
| No prescription change, n (%)                                            | 9 (30.0)                   |                 |
| No prescription, n (%)                                                   | 9 (30.0)                   |                 |
| <i>Among participants with no LDL-C value in pre-disclosure</i>          |                            | N=4             |
| Prescription change, n (%)                                               | 1 (25.0)                   |                 |
| Intensification, n (%)                                                   | 1 (100.0)                  |                 |

|                                                                          |           |
|--------------------------------------------------------------------------|-----------|
| No change in intensity or switch within the same medication class, n (%) | 0 (0.0)   |
| Decrease in intensity, n (%)                                             | 0 (0.0)   |
| No prescription change, n (%)                                            | 1 (25.0)  |
| No prescription, n (%)                                                   | 2 (50.0)  |
| <i>Among participants already achieved LDL-C goals in pre-disclosure</i> | N=4       |
| Prescription change, n (%)                                               | 0 (0.0)   |
| Intensification, n (%)                                                   | 0 (0.0)   |
| No change in intensity or switch within the same medication class, n (%) | 0 (0.0)   |
| Decrease in intensity, n (%)                                             | 0 (0.0)   |
| No prescription change, n (%)                                            | 4 (100.0) |
| No prescription, n (%)                                                   | 0 (0.0)   |
| <i>Among participants had not yet met LDL-C goals in pre-disclosure</i>  | N=22      |
| Prescription change, n (%)                                               | 11 (50.0) |
| Intensification, n (%)                                                   | 9 (81.8)  |
| No change in intensity or switch within the same medication class, n (%) | 0 (0.0)   |
| Decrease in intensity, n (%)                                             | 2 (18.2)  |
| No prescription change, n (%)                                            | 4 (18.2)  |
| No prescription, n (%)                                                   | 7 (31.8)  |

Statin intensity was defined based on the 2020 ACC/AHA Cholesterol Guidelines.



**Supplemental Table III.** Lipid levels (sub-cohort of participants with at least 18m post-disclosure follow-up)

|                                            | <b>n=20</b>    |                 |         |
|--------------------------------------------|----------------|-----------------|---------|
| <b>Lipid Panel Results</b>                 | Pre-disclosure | Post-disclosure | P value |
| LDL-C level, mg/dL, mean (SD)              | 155 (73.1)     | 142 (78.4)      | 0.23*   |
| LDL-C level < 130 mg/dL, n (%)             | 8 (40.0)       | 12 (60.0)       |         |
| LDL-C level < 100 mg/dL, n (%)             | 5 (25.0)       | 6 (30.0)        |         |
| LDL-C level < 70 mg/dL, n (%)              | 2 (10.0)       | 1 (5.0)         |         |
| HDL-C, mg/dL, mean (SD) †                  | 58 (22.3)      | 56 (25.4)       |         |
| Triglycerides, mg/dL, mean (SD) †          | 125 (92.7)     | 107 (64.2)      |         |
| Total cholesterol, mg/dL, mean (SD) †      | 235 (86.6)     | 209 (65.1)      |         |
| <b>Change in LDL-C after disclosure</b>    |                |                 |         |
| LDL-C change, %, mean (SD)                 | -2.5 (36.7)    |                 |         |
| <b>Obtainment of target LDL-C levels ‡</b> |                |                 |         |
| <b>Pre-disclosure at goal, n (%)</b>       | N=4 (20.0)     |                 |         |
| Post-disclosure at goal, n (%)             | 2 (10.0)       |                 |         |
| Post-disclosure not at goal, n (%)         | 2 (10.0)       |                 |         |
| decrease in Post §, n (%)                  | 0 (0.0)        |                 |         |
| increase in Post, n (%)                    | 2 (100.0)      |                 |         |
| no change in Post, n (%)                   | 0 (0.0)        |                 |         |
| <b>Pre-disclosure not at goal, n (%)</b>   | N=16           |                 |         |
| Post-disclosure at goal, n (%)             | 1 (6.3)        |                 |         |
| Post-disclosure not at goal, n (%)         | 15 (93.8)      |                 |         |
| decrease in Post §, n (%)                  | 10 (66.7)      |                 |         |
| increase in Post, n (%)                    | 3 (20.0)       |                 |         |
| no change in Post, n (%)                   | 2 (13.3)       |                 |         |

\* Paired t test to detect difference in LDL-C level between pre- and post-disclosure.

† Two participants did not have post-disclosure values (N=18).

‡ For those treatment for primary prevention the target LDL-C was < 100 mg/dL and for secondary prevention the target LDL-C was < 70 mg/dL

§ Decrease and increase change in post-ROR is only counted as valid change when % of LDL-C level change is  $\geq 8\%$ .

**Supplemental Table IV. Individual level data on pre- and post-disclosure prescription and LDL-C change**

| Case | Follow-up period at least 18 months (Y/N) | Statin intolerance (Y/N) | History of MI or Stroke event (Y/N) | Pre-disclosure Prescription 1 | Pre-disclosure Prescription 2 | Pre-disclosure Prescription 3 | Post-disclosure Prescription 1 | Post-disclosure Prescription 2 | Post-disclosure Prescription 3 | Change in prescriptions after disclosure    | LDL-C Goal status pre-disclosure* | LDL-C Goal status post-disclosure*  |
|------|-------------------------------------------|--------------------------|-------------------------------------|-------------------------------|-------------------------------|-------------------------------|--------------------------------|--------------------------------|--------------------------------|---------------------------------------------|-----------------------------------|-------------------------------------|
| 1    | Y                                         | N                        | Y                                   | ROSUVASTATIN 40 MG            | NIACIN ER 1000 MG             |                               | ROSUVASTATIN 40 MG             | NIACIN ER 1000 MG              | EZETIMIBE 10 MG                | Prescription change: intensification        | Pre not on goal                   | Post not on goal, decrease in Post  |
| 2    | Y                                         | Y                        | N                                   | ATORVASTATIN 40 MG            | COLESEVELAM HCL 625 MG        |                               | EVOLOCUMAB 420MG               |                                |                                | Prescription change: intensification        | NA                                | NA                                  |
| 3    | N                                         | N                        | N                                   | ROSUVASTATIN 40 MG            | NIACIN 1000MG                 |                               | ROSUVASTATIN 40 MG             | NIACIN 1000MG                  | EZETIMIBE 10MG                 | Prescription change: intensification        | NA                                | NA                                  |
| 4    | N                                         | N                        | N                                   | ATORVASTATIN 20 MG            |                               |                               | ATORVASTATIN 20 MG             |                                |                                | No prescription change                      | Pre not on goal                   | Post on goal                        |
| 5    | N                                         | Y                        | N                                   | ATORVASTATIN 80MG             |                               |                               | ROSUVASTATIN 40 MG             | EZETIMIBE 10MG                 |                                | Prescription change: intensification        | NA                                | NA                                  |
| 6    | N                                         | N                        | Y                                   | ROSUVASTATIN 40MG             | EZETIMIBE 10MG                |                               | ROSUVASTATIN 40MG              | EZETIMIBE 10MG                 |                                | No prescription change                      | Pre not on goal                   | Post not on goal, decrease in Post  |
| 7    | N                                         | Y                        | N                                   | ATORVASTATIN 80 MG            |                               |                               | ATORVASTATIN 40 MG             |                                |                                | Prescription change: No change in intensity | Pre on goal                       | Post on goal                        |
| 8    | Y                                         | Y                        | Y                                   | ATORVASTATIN 80MG             |                               |                               | ATORVASTATIN 80MG              | EZETIMIBE 10MG                 |                                | Prescription change: intensification        | Pre not on goal                   | Post not on goal, decrease in Post  |
| 9    | N                                         | Y                        | N                                   | ROSUVASTATIN 40MG             |                               |                               | SIMVASTATIN 40MG               |                                |                                | Prescription change: decrease in intensity  | Pre not on goal                   | Post not on goal, no change in Post |
| 10   | N                                         | N                        | Y                                   | ATORVASTATIN 80MG             | EZETIMIBE 10MG                |                               | ATORVASTATIN 80MG              |                                |                                | Prescription change: decrease in intensity  | Pre not on goal                   | Post not on goal, decrease in Post  |
| 11   | Y                                         | Y                        | N                                   | ATORVASTATIN 10MG             |                               |                               | ATORVASTATIN 10MG              | EZETIMIBE 10MG                 |                                | Prescription change: intensification        | Pre not on goal                   | Post not on goal, decrease in Post  |
| 12   | N                                         | N                        | N                                   | ATORVASTATIN 20MG             |                               |                               | ATORVASTATIN 20MG              |                                |                                | No prescription change                      | NA                                | NA                                  |

|    |   |   |   |                       |                     |                   |                       |                      |                       |                                                      |                    |                                           |
|----|---|---|---|-----------------------|---------------------|-------------------|-----------------------|----------------------|-----------------------|------------------------------------------------------|--------------------|-------------------------------------------|
| 13 | Y | Y | N | ROSUVASTATIN<br>40MG  | FENOFIBRATE<br>54MG | EZETIMIBE<br>10MG | ROSUVASTATI<br>N 40MG | FENOFIBRAT<br>E 54MG | EZETIMIBE<br>10MG     | No prescription<br>change                            | Pre not on<br>goal | Post not on<br>goal, no<br>change in Post |
| 14 | N | Y | N | ATORVASTATIN<br>10MG  |                     |                   | ATORVASTATI<br>N 20MG |                      |                       | Prescription<br>change: No<br>change in<br>intensity | Pre not on<br>goal | Post on goal                              |
| 15 | Y | N | N | ATORVASTATIN<br>40MG  |                     |                   | ATORVASTATI<br>N 40MG |                      |                       | No prescription<br>change                            | Pre on goal        | Post not on<br>goal                       |
| 16 | Y | Y | N | ROSUVASTATIN<br>10MG  | EZETIMIBE<br>10MG   |                   |                       |                      |                       | No prescription                                      | NA                 | NA                                        |
| 17 | N | Y | Y | PRAVASTATIN<br>40MG   |                     |                   | PRAVASTATIN<br>40MG   |                      |                       | No prescription<br>change                            | Pre not on<br>goal | Post not on<br>goal, no<br>change in Post |
| 18 | Y | N | Y | ATORVASTATIN<br>80MG  |                     |                   | ATORVASTATI<br>N 80MG |                      |                       | No prescription<br>change                            | Pre not on<br>goal | Post not on<br>goal, increase<br>in Post  |
| 19 | Y | Y | N | SIMVASTATIN<br>20MG   |                     |                   | SIMVASTATIN<br>20MG   |                      |                       | No prescription<br>change                            | Pre on goal        | Post not on<br>goal                       |
| 20 | Y | Y | Y | ATORVASTATIN<br>80MG  |                     |                   | ATORVASTATI<br>N 80MG | EZETIMIBE<br>10MG    | COLESEVELA<br>M 625MG | Prescription<br>change:<br>intensification           | NA                 | NA                                        |
| 21 | N | Y | N | ROSUVASTATIN<br>40MG  |                     |                   | ROSUVASTATI<br>N 40MG |                      |                       | No prescription<br>change                            | Pre not on<br>goal | Post not on<br>goal, decrease<br>in Post  |
| 22 | N | N | N | ATORVASTATIN<br>40 MG |                     |                   | ATORVASTATI<br>N 80MG | EZETIMIBE<br>10MG    |                       | Prescription<br>change:<br>intensification           | NA                 | NA                                        |
| 23 | N | N | N | ATORVASTATIN<br>40MG  |                     |                   | ATORVASTATI<br>N 40MG |                      |                       | No prescription<br>change                            | Pre not on<br>goal | Post not on<br>goal, decrease<br>in Post  |
| 24 | Y | Y | N | SIMVASTATIN<br>40MG   |                     |                   | EZETIMIBE<br>10MG     | PRAVASTATI<br>N 20MG | EVOLOCUMAB<br>140MG   | Prescription<br>change:<br>intensification           | NA                 | NA                                        |
| 25 | N | N | N | ROSUVASTATIN<br>40MG  |                     |                   | ROSUVASTATI<br>N 40MG |                      |                       | No prescription<br>change                            | NA                 | NA                                        |
| 26 | N | N | N | ATORVASTATIN<br>80MG  |                     |                   | ATORVASTATI<br>N 80MG |                      |                       | No prescription<br>change                            | NA                 | NA                                        |
| 27 | N | N | N | ROSUVASTATIN<br>40MG  |                     |                   | ROSUVASTATI<br>N 40MG |                      |                       | No prescription<br>change                            | Pre on goal        | Post on goal                              |
| 28 | Y | Y | N | ATORVASTATIN<br>40MG  |                     |                   |                       |                      |                       | No prescription                                      | Pre not on<br>goal | Post not on<br>goal, increase<br>in Post  |
| 29 | N | Y | N | ATORVASTATIN<br>20MG  |                     |                   | ATORVASTATI<br>N 80MG | EZETIMIBE<br>10MG    |                       | Prescription<br>change:<br>intensification           | Pre not on<br>goal | Post on goal                              |
| 30 | N | N | N | ROSUVASTATIN<br>10MG  |                     |                   | ROSUVASTATI<br>N 20MG |                      |                       | Prescription<br>change:<br>intensification           | NA                 | NA                                        |

|    |   |   |   |                                       |                      |                   |                                      |                      |                   |                                                      |                    |                                           |
|----|---|---|---|---------------------------------------|----------------------|-------------------|--------------------------------------|----------------------|-------------------|------------------------------------------------------|--------------------|-------------------------------------------|
| 31 | N | N | Y | ROSUVASTATIN<br>20MG                  |                      |                   | ATORVASTATI<br>N 40MG                |                      |                   | Prescription<br>change: No<br>change in<br>intensity | NA                 | NA                                        |
| 32 | N | N | N | ROSUVASTATIN<br>40MG                  |                      |                   | ROSUVASTATI<br>N 40MG                |                      |                   | No prescription<br>change                            | NA                 | NA                                        |
| 33 | N | N | N | ROSUVASTATIN<br>5MG                   |                      |                   | ROSUVASTATI<br>N 5MG                 |                      |                   | No prescription<br>change                            | Pre not on<br>goal | Post on goal                              |
| 34 | Y | N | N | ATORVASTATIN<br>80MG                  |                      |                   |                                      |                      |                   | No prescription                                      | Pre not on<br>goal | Post not on<br>goal, decrease<br>in Post  |
| 35 | N | Y | N | ROSUVASTATIN<br>10MG                  | COLESTIPOL<br>HCL 1G | EZETIMIBE<br>10MG | ROSUVASTATI<br>N 10MG                | COLESTIPOL<br>HCL 1G | EZETIMIBE<br>10MG | Prescription<br>change:<br>decrease in<br>intensity  | Pre not on<br>goal | Post not on<br>goal, increase<br>in Post  |
| 36 | N | Y | N | ATORVASTATIN<br>40MG                  |                      |                   | ATORVASTATI<br>N 40MG                |                      |                   | No prescription<br>change                            | Pre not on<br>goal | Post not on<br>goal, decrease<br>in Post  |
| 37 | N | Y | Y | ATORVASTATIN<br>80MG                  |                      |                   | ATORVASTATI<br>N 80MG                |                      |                   | No prescription<br>change                            | Pre not on<br>goal | Post not on<br>goal, no<br>change in Post |
| 38 | N | N | N | ATORVASTATIN<br>40MG                  |                      |                   | ATORVASTATI<br>N 40MG                | COLESTIPOL<br>1G     |                   | Prescription<br>change:<br>intensification           | NA                 | NA                                        |
| 39 | N | N | Y | ROSUVASTATIN<br>40MG                  |                      |                   | ROSUVASTATI<br>N 40MG                | EZETIMIBE<br>10MG    |                   | Prescription<br>change:<br>intensification           | Pre not on<br>goal | Post not on<br>goal, no<br>change in Post |
| 40 | N | N | N | ATORVASTATIN<br>40 MG                 |                      |                   | ROSUVASTATI<br>N 40MG                |                      |                   | Prescription<br>change: No<br>change in<br>intensity | NA                 | NA                                        |
| 41 | Y | Y | Y | ATORVASTATIN<br>80 MG                 |                      |                   | ATORVASTATI<br>N 80MG                | EVOLOCUMA<br>B 140MG |                   | Prescription<br>change:<br>intensification           | Pre not on<br>goal | Post on goal                              |
| 42 | Y | N | N | ROSUVASTATIN<br>40MG                  |                      |                   | ROSUVASTATI<br>N 40MG                |                      |                   | No prescription<br>change                            | NA                 | NA                                        |
| 43 | N | N | N | ATORVASTATIN<br>40MG                  |                      |                   | ATORVASTATI<br>N 80MG                |                      |                   | Prescription<br>change: No<br>change in<br>intensity | Pre not on<br>goal | Post on goal                              |
| 44 | N | N | N | ROSUVASTATIN<br>40MG                  |                      |                   | ROSUVASTATI<br>N 40MG                |                      |                   | No prescription<br>change                            | Pre not on<br>goal | Post not on<br>goal, increase<br>in Post  |
| 45 | N | N | N | EZETIMIBE-<br>SIMVASTATIN 10-<br>40MG |                      |                   | EZETIMIBE-<br>SIMVASTATIN<br>10-40MG |                      |                   | No prescription<br>change                            | Pre on goal        | Post on goal                              |
| 46 | N | N | N | ATORVASTATIN<br>10MG                  |                      |                   | ATORVASTATI<br>N 10MG                |                      |                   | No prescription<br>change                            | Pre not on<br>goal | Post not on<br>goal, decrease<br>in Post  |

|    |   |   |   |                      |                      |  |                       |                       |  |                                                      |                    |                                           |
|----|---|---|---|----------------------|----------------------|--|-----------------------|-----------------------|--|------------------------------------------------------|--------------------|-------------------------------------------|
| 47 | N | Y | Y | ROSUVASTATIN<br>40MG |                      |  |                       |                       |  | No prescription                                      | Pre not on<br>goal | Post not on<br>goal, decrease<br>in Post  |
| 48 | N | N | N | ROSUVASTATIN<br>40MG |                      |  | ROSUVASTATI<br>N 40MG | EZETIMIBE<br>10MG     |  | Prescription<br>change:<br>intensification           | NA                 | NA                                        |
| 49 | N | N | N | ATORVASTATIN<br>40MG |                      |  | ATORVASTATI<br>N 40MG |                       |  | No prescription<br>change                            | NA                 | NA                                        |
| 50 | N | N | N | ATORVASTATIN<br>40MG |                      |  | ATORVASTATI<br>N 40MG |                       |  | No prescription<br>change                            | NA                 | NA                                        |
| 51 | N | Y | N | ROSUVASTATIN<br>40MG |                      |  | ROSUVASTATI<br>N 40MG |                       |  | No prescription<br>change                            | Pre not on<br>goal | Post on goal                              |
| 52 | Y | N | N | ATORVASTATIN<br>40MG |                      |  | ATORVASTATI<br>N 40MG |                       |  | No prescription<br>change                            | Pre on goal        | Post on goal                              |
| 53 | N | Y | Y | ROSUVASTATIN<br>10MG | EZETIMIBE<br>10MG    |  | EZETIMIBE<br>10MG     |                       |  | Prescription<br>change:<br>decrease in<br>intensity  | Pre not on<br>goal | Post not on<br>goal, no<br>change in Post |
| 54 | Y | Y | N | ATORVASTATIN<br>20MG |                      |  | ATORVASTATI<br>N 80MG |                       |  | Prescription<br>change:<br>intensification           | Pre not on<br>goal | Post not on<br>goal, decrease<br>in Post  |
| 55 | N | N | N | ROSUVASTATIN<br>20MG |                      |  | ROSUVASTATI<br>N 20MG |                       |  | No prescription<br>change                            | Pre on goal        | Post on goal                              |
| 56 | Y | Y | N | ATORVASTATIN<br>40MG |                      |  |                       |                       |  | No prescription                                      | Pre not on<br>goal | Post not on<br>goal, increase<br>in Post  |
| 57 | Y | Y | Y | PRAVASTATIN<br>80MG  | COLESEVELAM<br>625MG |  | COLESEVELAM<br>625MG  | ATORVASTA<br>TIN 80MG |  | Prescription<br>change:<br>intensification           | Pre not on<br>goal | Post not on<br>goal, no<br>change in Post |
| 58 | Y | Y | N | SIMVASTATIN<br>10MG  |                      |  | EZETIMIBE<br>10MG     |                       |  | Prescription<br>change:<br>decrease in<br>intensity  | NA                 | NA                                        |
| 59 | N | N | N | ROSUVASTATIN<br>20MG |                      |  | ROSUVASTATI<br>N 20MG |                       |  | No prescription<br>change                            | Pre not on<br>goal | Post on goal                              |
| 60 | N | N | N | ROSUVASTATIN<br>20MG |                      |  | ROSUVASTATI<br>N 40MG |                       |  | Prescription<br>change: No<br>change in<br>intensity | Pre not on<br>goal | Post not on<br>goal, no<br>change in Post |
| 61 | N | Y | N | ATORVASTATIN<br>10MG |                      |  | ATORVASTATI<br>N 10MG |                       |  | No prescription<br>change                            | NA                 | NA                                        |
| 62 | N | Y | N | ATORVASTATIN<br>80MG |                      |  | ATORVASTATI<br>N 80MG |                       |  | No prescription<br>change                            | NA                 | NA                                        |
| 63 | N | N | N | ATORVASTATIN<br>80MG |                      |  | ATORVASTATI<br>N 80MG |                       |  | No prescription<br>change                            | NA                 | NA                                        |
| 64 | N | N | N | ATORVASTATIN<br>80MG | EZETIMIBE<br>10MG    |  | ATORVASTATI<br>N 80MG | EZETIMIBE<br>10MG     |  | No prescription<br>change                            | Pre not on<br>goal | Post not on<br>goal, decrease<br>in Post  |

|    |   |   |   |                      |  |  |                       |                   |  |                                            |                    |                                          |
|----|---|---|---|----------------------|--|--|-----------------------|-------------------|--|--------------------------------------------|--------------------|------------------------------------------|
| 65 | N | N | N |                      |  |  | ATORVASTATI<br>N 80mg |                   |  | Prescription<br>change:<br>intensification | Pre not on<br>goal | Post on goal                             |
| 66 | Y | N | N |                      |  |  | ATORVASTATI<br>N 40MG |                   |  | Prescription<br>change:<br>intensification | Pre not on<br>goal | Post not on<br>goal, decrease<br>in Post |
| 67 | N | Y | N |                      |  |  | ROSUVASTATI<br>N 40MG | EZETIMIBE<br>10MG |  | Prescription<br>change:<br>intensification | NA                 | NA                                       |
| 68 | Y | N | N |                      |  |  |                       |                   |  | No prescription                            | NA                 | NA                                       |
| 69 | N | N | N | ATORVASTATIN<br>80MG |  |  |                       |                   |  | No prescription                            | NA                 | NA                                       |
| 70 | N | N | N | ATORVASTATIN<br>40MG |  |  |                       |                   |  | No prescription                            | Pre not on<br>goal | Post not on<br>goal, decrease<br>in Post |
| 71 | N | N | N | ROSUVASTATIN<br>40MG |  |  |                       |                   |  | No prescription                            | Pre not on<br>goal | Post not on<br>goal, decrease<br>in Post |
| 72 | N | N | N | SIMVASTATIN<br>40MG  |  |  |                       |                   |  | No prescription                            | NA                 | NA                                       |
| 73 | N | N | N | ATORVASTATIN<br>80MG |  |  |                       |                   |  | No prescription                            | NA                 | NA                                       |
| 74 | N | N | N |                      |  |  |                       |                   |  | No prescription                            | NA                 | NA                                       |
| 75 | Y | N | N | ATORVASTATIN<br>80MG |  |  |                       |                   |  | No prescription                            | NA                 | NA                                       |
| 76 | N | N | N | ROSUVASTATIN<br>40MG |  |  | ROSUVASTATI<br>N 40MG |                   |  | No prescription<br>change                  | NA                 | NA                                       |
| 77 | N | N | N |                      |  |  |                       |                   |  | No prescription                            | NA                 | NA                                       |
| 78 | N | N | N |                      |  |  |                       |                   |  | No prescription                            | NA                 | NA                                       |
| 79 | N | N | N |                      |  |  |                       |                   |  | No prescription                            | NA                 | NA                                       |
| 80 | N | N | Y |                      |  |  |                       |                   |  | No prescription                            | Pre on goal        | Post not on<br>goal                      |
| 81 | N | Y | N |                      |  |  |                       |                   |  | No prescription                            | NA                 | NA                                       |
| 82 | Y | N | N |                      |  |  |                       |                   |  | No prescription                            | Pre not on<br>goal | Post not on<br>goal, decrease<br>in Post |
| 83 | Y | N | N |                      |  |  |                       |                   |  | No prescription                            | NA                 | NA                                       |
| 84 | N | N | N |                      |  |  |                       |                   |  | No prescription                            | NA                 | NA                                       |
| 85 | N | N | N |                      |  |  |                       |                   |  | No prescription                            | NA                 | NA                                       |
| 86 | N | N | Y | ROSUVASTATIN<br>40MG |  |  | ROSUVASTATI<br>N 40MG |                   |  | No prescription<br>change                  | NA                 | NA                                       |

|    |   |   |   |                             |                       |                   |                       |                       |                        |                                                     |                    |                                           |
|----|---|---|---|-----------------------------|-----------------------|-------------------|-----------------------|-----------------------|------------------------|-----------------------------------------------------|--------------------|-------------------------------------------|
| 87 | N | N | N | ROSUVASTATIN<br>20MG        | EZETIMIBE<br>10MG     |                   | ROSUVASTATI<br>N 20MG | EZETIMIBE<br>10MG     | EVOLOCUMAB<br>140MG/ML | Prescription<br>change:<br>intensification          | NA                 | NA                                        |
| 88 | Y | Y | N |                             |                       |                   |                       |                       |                        | No prescription                                     | Pre not on<br>goal | Post not on<br>goal, decrease<br>in Post  |
| 89 | Y | Y | Y | MICRONIZED<br>COLESTIPOL 1G | ROSUVASTATI<br>N 40MG | EZETIMIBE<br>10MG | ROSUVASTATI<br>N 40MG | EZETIMIBE<br>10MG     |                        | Prescription<br>change:<br>decrease in<br>intensity | Pre not on<br>goal | Post not on<br>goal, decrease<br>in Post  |
| 90 | Y | N | N | EZETIMIBE 10MG              | ATORVASTATI<br>N 80MG |                   | EZETIMIBE<br>10MG     | ATORVASTA<br>TIN 80MG |                        | No prescription<br>change                           | Pre on goal        | Post on goal                              |
| 91 | N | N | Y | ROSUVASTATIN<br>20MG        |                       |                   | ROSUVASTATI<br>N 40MG | EZETIMIBE<br>10MG     | EVOLOCUMAB<br>140MG/ML | Prescription<br>change:<br>intensification          | NA                 | NA                                        |
| 92 | Y | N | N | ATORVASTATIN<br>80MG        |                       |                   | ATORVASTATI<br>N 80MG |                       |                        | No prescription<br>change                           | Pre not on<br>goal | Post not on<br>goal, decrease<br>in Post  |
| 93 | N | N | N | ROSUVASTATIN<br>10MG        | FENOFIBRATE<br>145MG  |                   | ROSUVASTATI<br>N 10MG |                       |                        | Prescription<br>change:<br>decrease in<br>intensity | Pre not on<br>goal | Post not on<br>goal, no<br>change in Post |
| 94 | N | N | N | EZETIMIBE 10MG              | ATORVASTATI<br>N 20MG |                   | ATORVASTATI<br>N 80MG | PRALUENT<br>75ML/MG   |                        | Prescription<br>change:<br>intensification          | NA                 | NA                                        |
| 95 | N | N | N | SIMVASTATIN<br>10MG         |                       |                   |                       |                       |                        | No prescription                                     | NA                 | NA                                        |
| 96 | Y | N | N | EZETIMIBE 10MG              | ROSUVASTATI<br>N 40MG |                   | EZETIMIBE<br>10MG     | ROSUVASTA<br>TIN 40MG |                        | No prescription<br>change                           | NA                 | NA                                        |

Only includes values for participants who had both pre- and post-disclosure LDL-C values available for review and the post-disclosure LDL-C reflects the most recent prescription, i.e. LDL-C level had to be tested at least 4 weeks after changing the prescription. Pre-disclosure LDL-C was defined as the most recent LDL-C drawn prior to the disclosure of the FH-associated variant. Post-disclosure LDL-C was defined as the last LDL-C drawn before the end of the study period. LDL-C on goal was targeted at < 100 mg/dL for those treatment for primary prevention and < 70 mg/dL for secondary prevention. Decrease and increase change in post-disclosure is only counted as valid change when % of LDL-C level change is >=8%. Y=Yes; N=No; NA=Not Available; MI=myocardial infarction; LDL-C= low-density lipoprotein cholesterol.
